# Supplementary material for: NFAT-mediated defects in erythropoiesis cause anemia in Il2−/− mice
Source: PubMed Central journal article supplement (PMC5839390; doi:10.18632/oncotarget.23745), 2017-12-28
Supplement: oncotarget-09-9632-s001.pdf [file oncotarget-09-9632-s001.pdf]

## **NFAT-mediated defects in erythropoiesis cause anemia in *Irf2*<sup>-/-</sup> mice**

### **SUPPLEMENTARY MATERIALS**

**Supplementary Table 1: List of RT-PCR and ChIP primers. See\_Supplementary\_Table 1**
